# Supplementary material for: Side-chain alkylation of toluene with methanol over cesium-ion-exchanged zeolite LSX and X catalysts
Source: Royal Society of Chemistry journal article supplement (doi:10.1039/d1nj04239d), 2021-11-29
Supplement: d1nj04239d1.pdf [file d1nj04239d1.pdf]

## Supporting information

Side-chain alkylation of toluene with methanol over cesium ion-  
exchanged zeolites LSX and X catalysts

Xiaoxia Wang, Guoqing Zhao, Lei Miao, Zhe Hong, Yanqing Huang, Zhirong Zhu\*

School of Chemical Science and Engineering, Tongji University, Shanghai 200092, P.

R. China

\* To whom correspondence should be addressed.

E-mail: zhuzhirong@tongji.edu.cn

Tel: (+86) 021-65982836

Table S1 The physicochemical characteristics and catalytic activities of different catalysts.

Table S2 GC-MS analysis of the soluble coke on used CsX catalyst

### Synthesis of LSX

LSX zeolite was synthesized with the following steps. First, 18.33 g sodium hydroxide (96 wt.%) and 21.78 g potassium hydroxide (85 wt.%) were added into 54.98 g deionized water, stirred until dissolved; Second, a sodium aluminate solution was prepared by adding 24.87 g sodium aluminate (41 wt.% Al<sub>2</sub>O<sub>3</sub>, 30 wt.% Na<sub>2</sub>O) into 30 g deionized water under agitation for 1 h. Then a sodium aluminate alkaline solution was obtained by mixing the alkaline solution with sodium aluminate solution thoroughly. Third, 66.09 g sodium silicate (20 wt.% Na<sub>2</sub>O, 20 wt.% SiO<sub>2</sub>) dissolved in 70 g deionized water. The sodium aluminate alkaline mixture solution was dropped into the sodium silicate solution and mixed thoroughly. The system was treated at 343 K for 3 h, then heated up to 363 K rapidly and stood for 2 h under autogenous pressure. Finally, the LSX zeolite was obtained after filtrating, washing, drying, and calcining in the air at 773 K for 4 h.

Table S1 The physicochemical characteristics of different catalysts.

| Samples | S <sub>BET</sub> (m <sup>2</sup> ·g <sup>-1</sup> ) <sup>a</sup> | V <sub>micro</sub> (cm <sup>3</sup> ·g <sup>-1</sup> ) <sup>b</sup> | V <sub>meso</sub> (cm <sup>3</sup> ·g <sup>-1</sup> ) <sup>b</sup> | CsED (%) <sup>c</sup> | Si/Al <sup>c</sup> |
|---------|------------------------------------------------------------------|---------------------------------------------------------------------|--------------------------------------------------------------------|-----------------------|--------------------|
| LSX     | 505                                                              | 0.18                                                                | 0.03                                                               | -                     | 1.01               |
| CsLSX   | 231                                                              | 0.08                                                                | 0.14                                                               | 65.4                  | 1.07               |
| NaX     | 487                                                              | 0.22                                                                | 0.15                                                               | -                     | 1.27               |
| CsX     | 387                                                              | 0.14                                                                | 0.12                                                               | 62.8                  | 1.29               |

<sup>a</sup>Calculated using the BET method.

<sup>b</sup>Determined using the *t*-plot method.

<sup>c</sup>Obtained from ICP-AES results.

<sup>c</sup>cesium ion exchange degrees(CsED)was calculated by 
$$CsED(\%) = \frac{W_{Na,i} - W_{Na,t}}{W_{Na,i}} \times 100$$
, where

$W_{Na,i}$  and  $W_{Na,t}$  were the mass percentage of Na in the initial LSX or NaX and treated zeolites,

respectively.

Table S2 GC-MS analysis of the soluble coke on used CsX catalyst

| Monocyclic aromatic compound | Polycyclic aromatic compound |                                  |
|------------------------------|------------------------------|----------------------------------|
| tetramethylbenzene           | pyrene                       | 1,2-dipropylbenzenealkanes       |
| Trimethyl isopropyl benzene  | 1-hydroxy-1H-indene          | 3,4-diisopropylbiphenyl          |
| 4-Ethyl-o-xylene             | 1-Naphthalenyl               | Diisopropyl dimethyl<br>biphenyl |
| diisopropyl phenol           | fluoranthene                 | -                                |
